# Supplementary material for: GSI Treatment Preserves Protein Synthesis in C2C12 Myotubes
Source: MDPI journal article supplement (doi:10.3390/cells10071786), 2021-07-15
Supplement: s1 [file s1]

## Supplementary

### GSI Treatment Preserves Protein Synthesis in C2C12 Myotubes

Joshua R. Huot, Brian Thompson, Charlotte McMullen, Joseph S. Marino and Susan T. Arthur

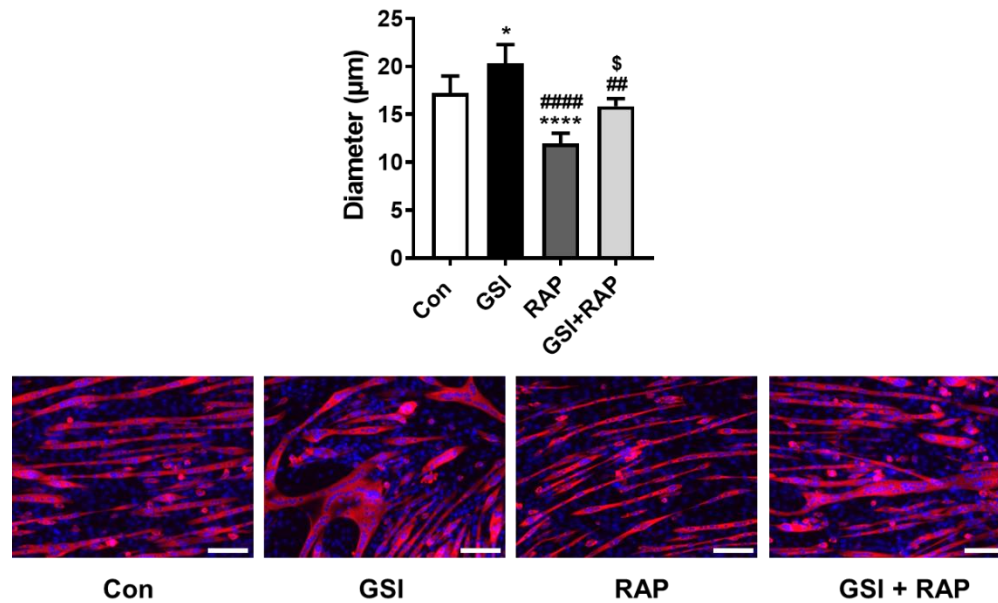

**Figure S1. GSI preserves myotube size in the presence of rapamycin.** Quantification of myotube diameter (400 per condition) and representative images of 96-hour myotubes co-stained with myosin heavy chain (MHC) and DAPI. Images were taken at 10x magnification and the scale bar = 100 μm. 72 hours post-differentiation, C2C12 cells were treated every 12 hours with either Con, 4μM γ-secretase inhibitor (GSI), 100nM rapamycin (RAP), or GSI + RAP co-treatment until 96 hours post-differentiation. All data were analyzed using a one-way ANOVA followed by Tukey's multiple comparison test. \* $p < 0.05$ , \*\*\*\* $p < 0.0001$  vs. Con; ## $p < 0.01$ , #### $p < 0.0001$  vs. GSI; \$ $p < 0.05$  vs. RAP. Data are mean  $\pm$  SD.

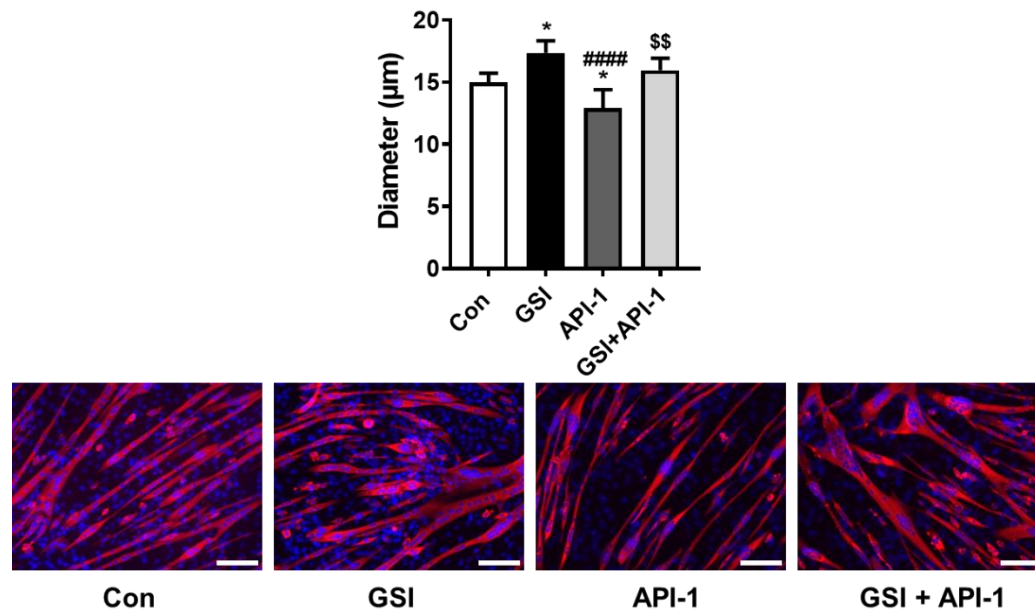

**Figure S2. GSI preserves myotube size in the presence of API-1.** Quantification of myotube diameter (400 per condition) and representative images of 96-hour myotubes co-stained with myosin heavy chain (MHC) and DAPI. Images were taken at 10x magnification and the scale bar = 100 μm. 72 hours post-differentiation, C2C12 cells were treated every 12 hours with either Con, 4μM γ-secretase inhibitor (GSI), 10μM 4-Amino-5,8-dihydro-5-oxo-8-β-D-ribofuranosyl-pyrido[2,3-d]pyrimidine-6-carboxamide (API-1), or GSI + API-1 co-treatment until 96 hours post-differentiation. All data were analyzed using a one-way ANOVA followed by Tukey's multiple comparison test. \*p < 0.05, vs. Con; ####p < 0.0001 vs. GSI; \$\$p < 0.01 vs. API-1. Data are mean ± SD.

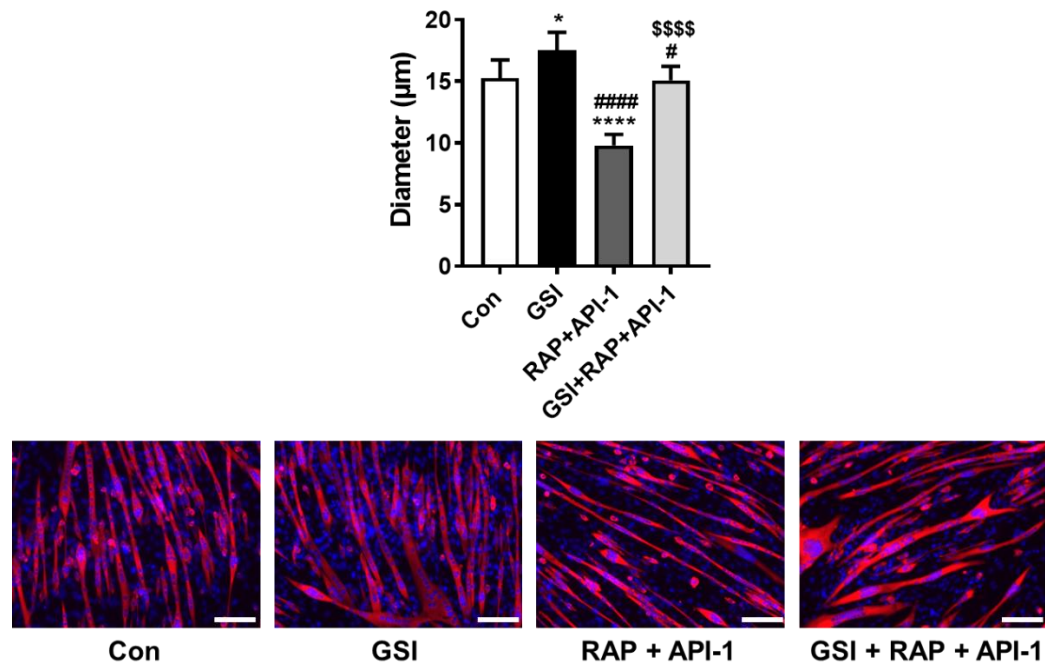

**Figure S3. GSI preserves myotube size in the presence of rapamycin and API-1.** Quantification of myotube diameter (400 per condition) and representative images of 96-hour myotubes co-stained with myosin heavy chain (MHC) and DAPI. Images were taken at 10x magnification and the scale bar = 100 μm. 72 hours post-differentiation, C2C12 cells were treated every 12 hours with either Con, 4μM γ-secretase inhibitor (GSI), 100nm rapamycin (RAP) + 10μM 4-Amino-5,8-dihydro-5-oxo-8-β-D-ribofuranosyl-pyrido[2,3-d]pyrimidine-6-carboxamide (API-1), or GSI + RAP + API-1 until 96 hours post-differentiation. All data were analyzed using a one-way ANOVA followed by Tukey's multiple comparison test. \* $p < 0.05$ , \*\*\* $p < 0.0001$  vs. Con; # $p < 0.05$ , #### $p < 0.0001$  vs. GSI; \$\$\$\$ $p < 0.0001$  vs. RAP+API-1. Data are mean  $\pm$  SD.
